# Supplementary material for: An integrated text mining framework for metabolic interaction network reconstruction
Source: PeerJ journal article supplement (doi:10.7717/peerj.1811), 2016-03-21
Supplement: additional_file_3.pdf [file additional_file_3.pdf]

### **ADDITIONAL FILE 3: Top ten list of event words identified in the ME corpus**

**Additional Table 3.1 – Event word counts in the ME corpus**

| <b>Event words</b> | <b>Event words count (%)</b> |
|--------------------|------------------------------|
| Catalyzes (V)      | 47 (9.75%)                   |
| Biosynthesis (N)   | 35 (7.26%)                   |
| Synthesis (N)      | 30 (6.22%)                   |
| Formation (N)      | 23 (4.77%)                   |
| Hydrolysis (N)     | 19 (3.94%)                   |
| Conversion (N)     | 16 (3.32%)                   |
| Utilization (N)    | 14 (2.90%)                   |
| Catalyzed (V)      | 13 (2.70%)                   |
| Catalyze (V)       | 12 (2.49%)                   |
| Metabolism (N)     | 12 (2.49%)                   |
| Total              | 221 (45.84%)                 |

For each event word, its type is given in ((N)ominalised form and (V)erb form) together with an indication of the number of event words and the percentage of event words.
