# Supplementary material for: An integrated text mining framework for metabolic interaction network reconstruction
Source: PeerJ journal article supplement (doi:10.7717/peerj.1811), 2016-03-21
Supplement: additional_file_5.pdf [file additional_file_5.pdf]

**ADDITIONAL FILE 5:** The Superpathway of leucine, valine, and isoleucine biosynthesis from metabolic interaction network reconstruction from MEE and MINR modules.

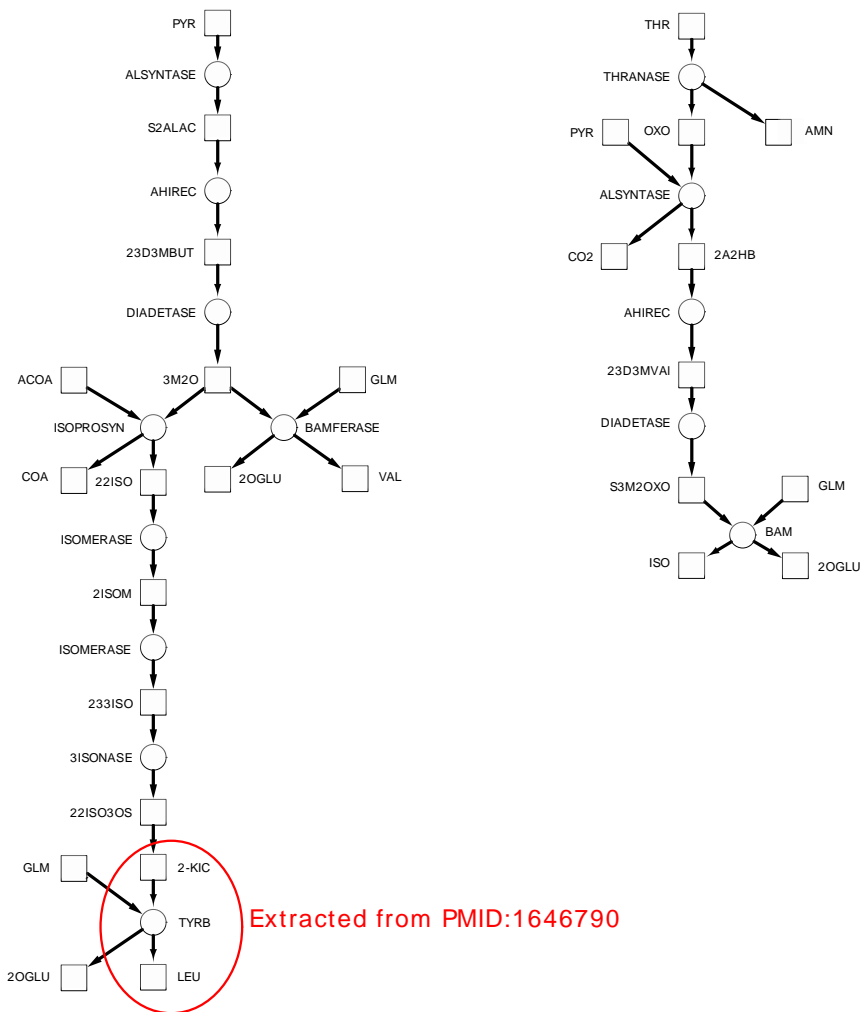

**Additional Figure 5.1 – The reconstructed Superpathway of leucine, valine and isoleucine biosynthesis.**

**Note:** This Superpathway is taken from EcoCyc database and is used Cytoscape version 3.0.1. for visualization. A square node means metabolite. A circle node means enzyme. Arrow shows a direction of enzyme-metabolite interaction

**Additional Table 5.1 – Full name and abbreviation of metabolites**

| <b>Full name</b>                | <b>Abbreviation</b> |
|---------------------------------|---------------------|
| Pyruvate                        | PYR                 |
| (2R,3S)-3-Isopropylmalate       | 233ISO              |
| (s)-2-Acetolactate              | S2ALAC              |
| (2S)-2-Isopropyl-3-oxosuccinate | 22ISO3OS            |
| 4-Methyl-2-oxopentanoate        | 2-KIC               |
| 2,3-Dihydroxy-3-methylbutanoate | 23D3MBUT            |
| L-Leucine                       | LEU                 |
| Acetyl-CoA                      | ACOA                |
| L-threonine                     | THR                 |
| 3-methyl-2-oxobutanoate         | 3M2O                |
| L-glutamate                     | GLM                 |
| 2-Oxobutanoate                  | OXO                 |
| CO <sub>2</sub>                 | CO2                 |
| Coenzyme A                      | COA                 |
| 2-Aceto-2-hydroxybutanoate      | 2A2HB               |
| (2S)-2-Isopropylmalate          | 22ISO               |
| 2,3-Dihydroxy-3-methylvalerate  | 23D3MVAL            |
| 2-Oxoglutarate                  | 2OGLU               |
| (S)-3-Methyl-2-oxopentanoate    | S3M2OXO             |
| L-Valine                        | VAL                 |
| L-Isoleucine                    | ISO                 |
| 2-Isopropylmaleate              | 2ISOM               |
| Ammonia                         | AMN                 |

**Additional Table 5.2 – Full Name and abbreviation of enzymes**

| <b>Full name</b>                              | <b>Abbreviation</b> |
|-----------------------------------------------|---------------------|
| Acetolactate synthase                         | ALS YNTASE          |
| 3-isopropylmalate dehydrogenase               | 3ISONASE            |
| acetohydroxy acid isomeroreductase            | AHIREC              |
| tyrosine aminotransferase/branched-chain      | TYRB                |
| dihydroxy acid dehydratase                    | DIADETASE           |
| threonine deaminase                           | THRANASE            |
| 2-isopropylmalate synthase                    | ISOPROSYN           |
| branched-chain amino-acid<br>aminotransferase | BAMFERASE           |
| isopropylmalate isomerase                     | ISOMERASE           |
| branched-chain amino-acid                     | BAM                 |
